# Supplementary material
Source: publisher figshare collection journal article supplement (https://acs.figshare.com/ndownloader/files/20103983)
Supplement: Supplementary file 1 [file 20103983]

# Polymer grafting inside wood cellulose fibers by improved hydroxyl accessibility from fiber swelling

## Supporting information

Peter Olsén\*, Natalia Herrera and Lars A. Berglund

*Wallenberg Wood Science Center, WWSC, Department of Fibre and Polymer Technology, KTH Royal Institute of Technology, Teknikringen 56-58, 100 44 Stockholm, Sweden*

## Contents

|                                                  |    |
|--------------------------------------------------|----|
| Polymerization Details .....                     | 2  |
| Dispersed fibres in $\text{CDCl}_3$ .....        | 6  |
| Calculation of graft-coverage. Equation S1 ..... | 10 |
| Free polymer Characterization .....              | 10 |

## Polymerization Details

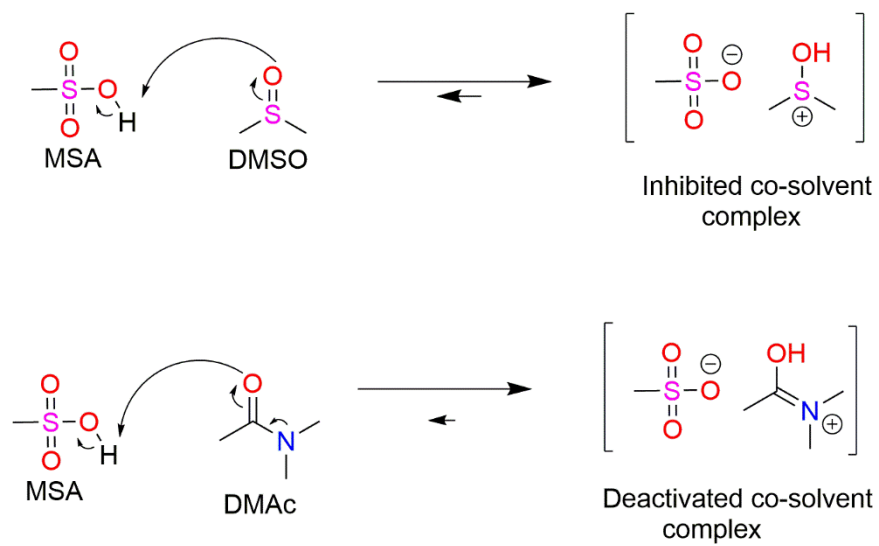

**Scheme S1.** Mechanistic description for co-solvent related catalyst deactivation.

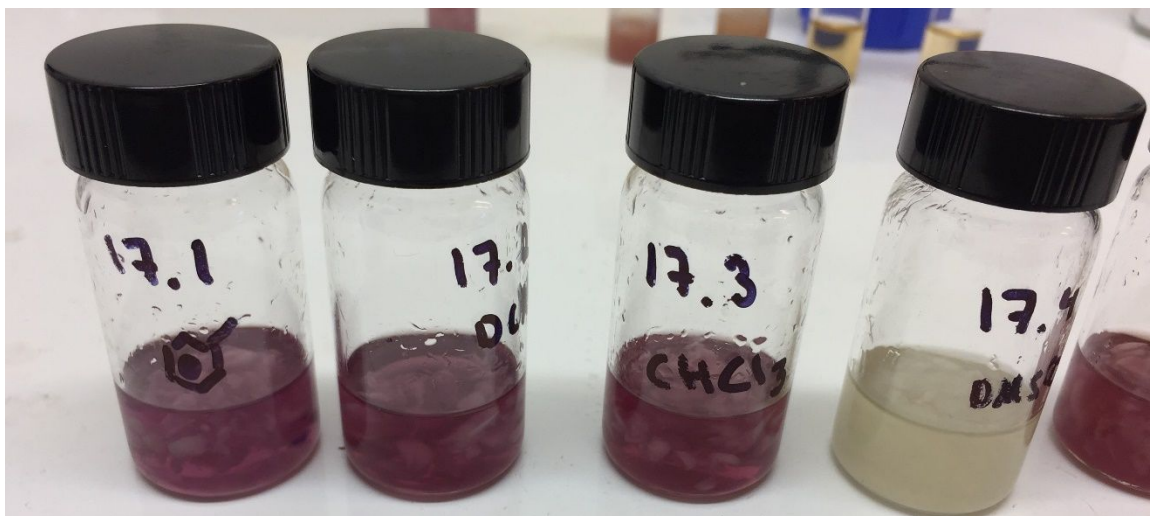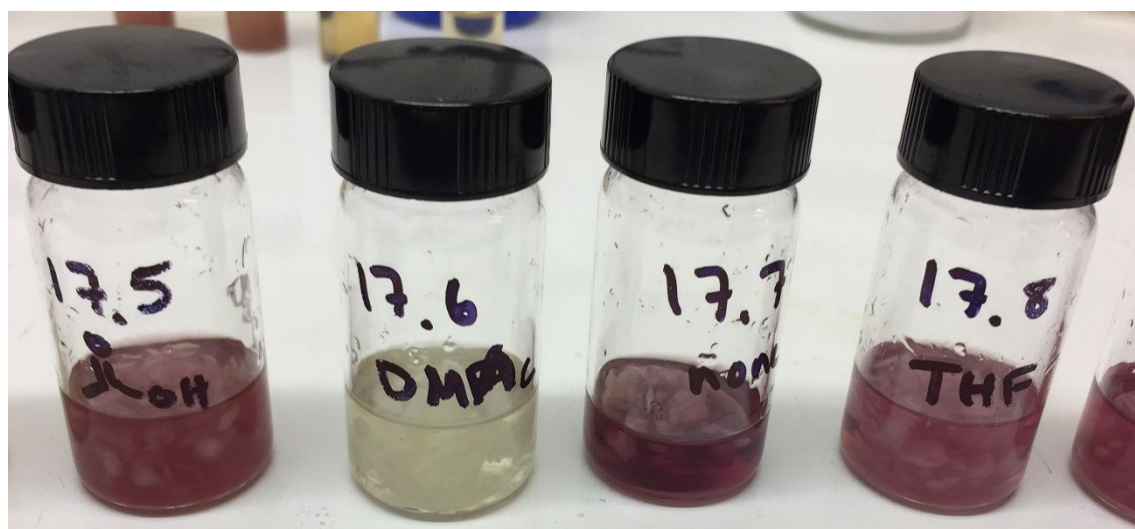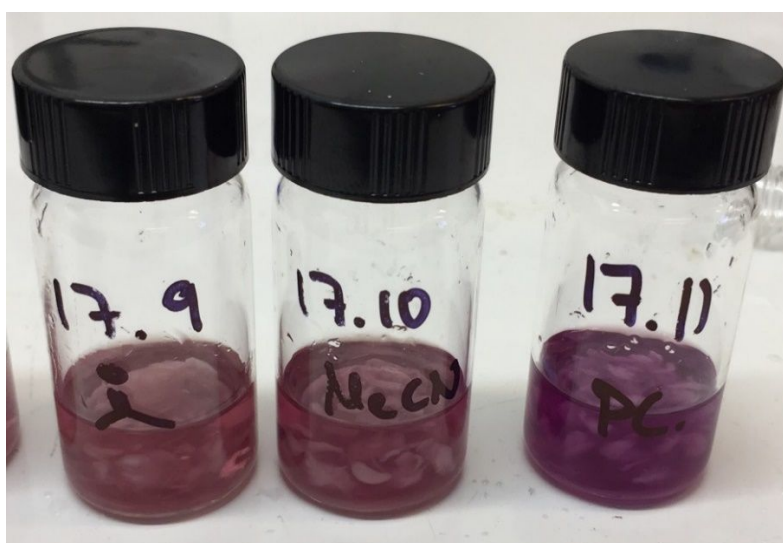

Figure S1. Activation of  $\epsilon$ CL with MSA in different solvent systems with a CL:solvent weight ratio of 2:1.

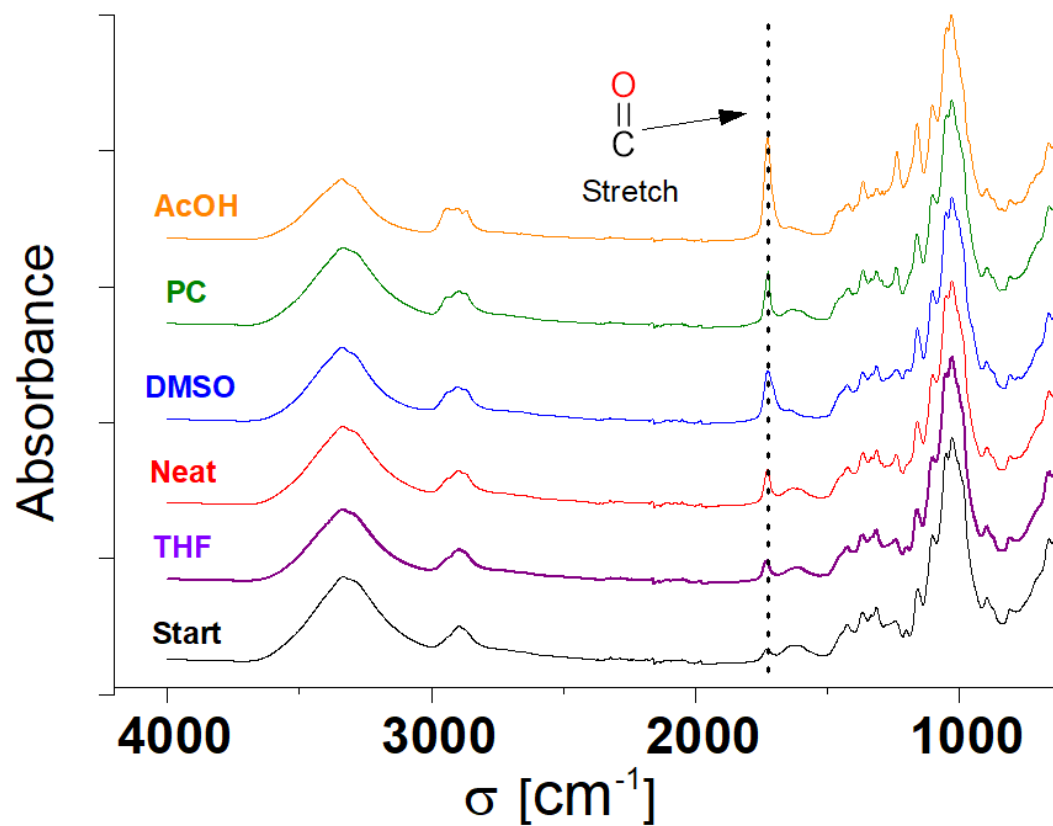

Figure S2. FTIR data over the grafted-HC fibres in different solvent systems

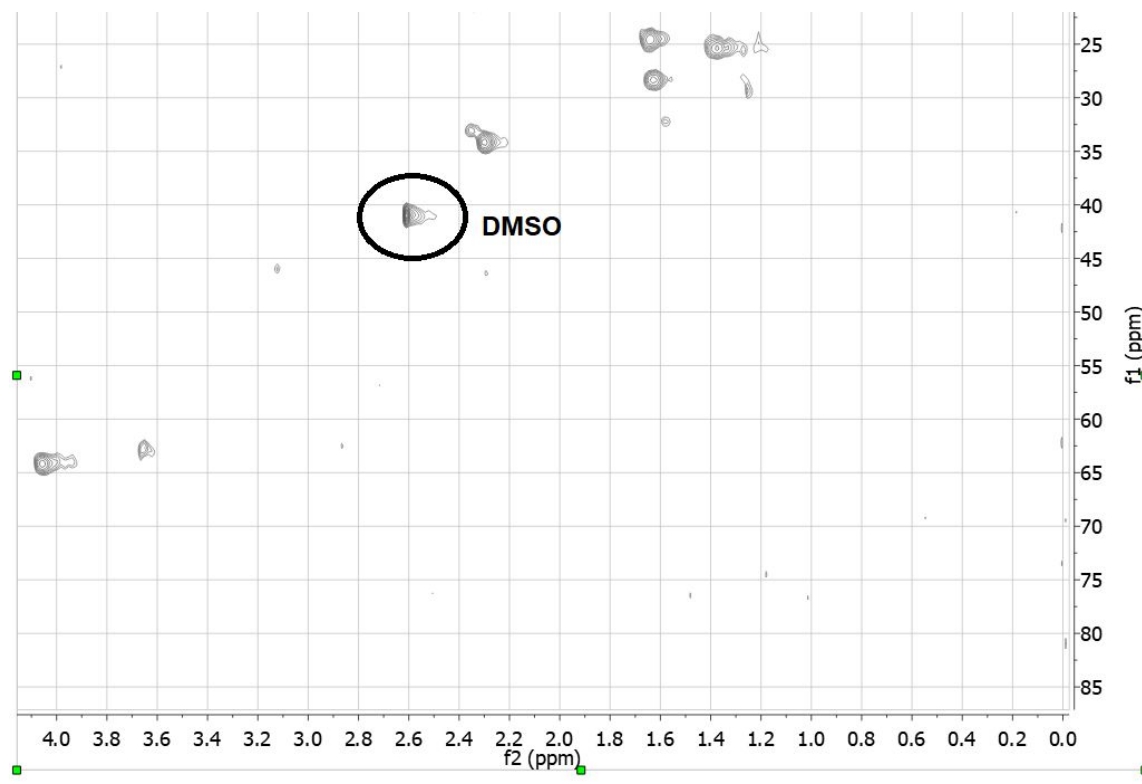

**Figure S3.**  $^1\text{H}$ - $^{13}\text{C}$  HSQC of 10 mg hollocellulose grafted with PCL with 1/3 (v/v) of DMSO as a cosolvent, the analysis was performed in 1 ml  $\text{CDCl}_3$ . Showing that some DMSO still is present around the fibers.

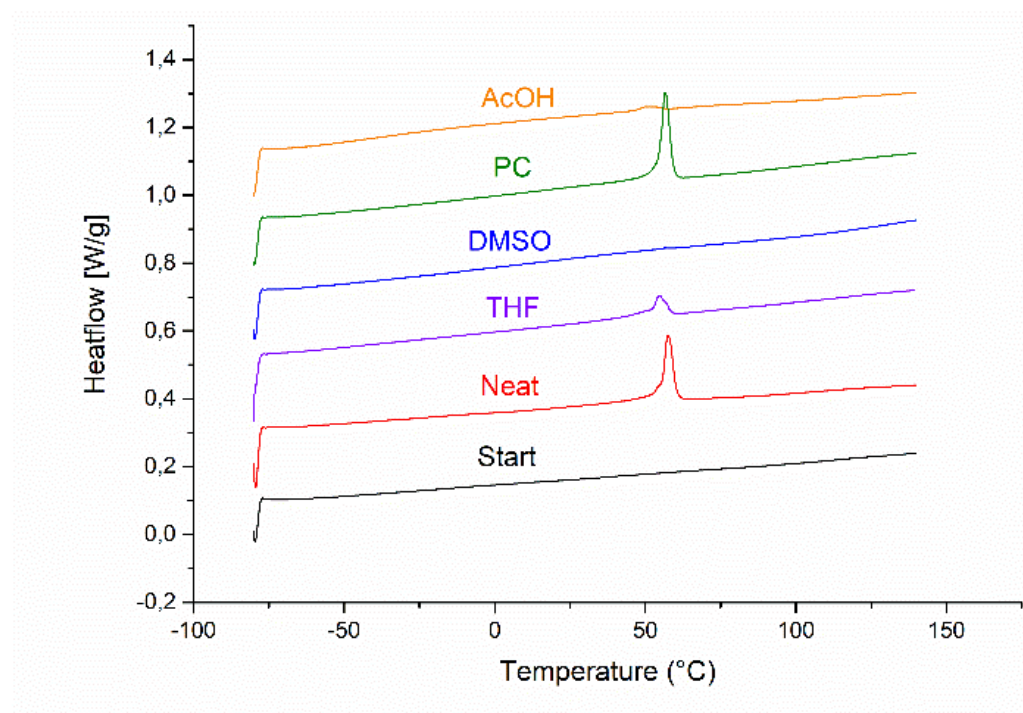

**Figure S4.** DSC data over the grafted-HC fibres in different solvent systems

## Dispersed fibres in $\text{CDCl}_3$

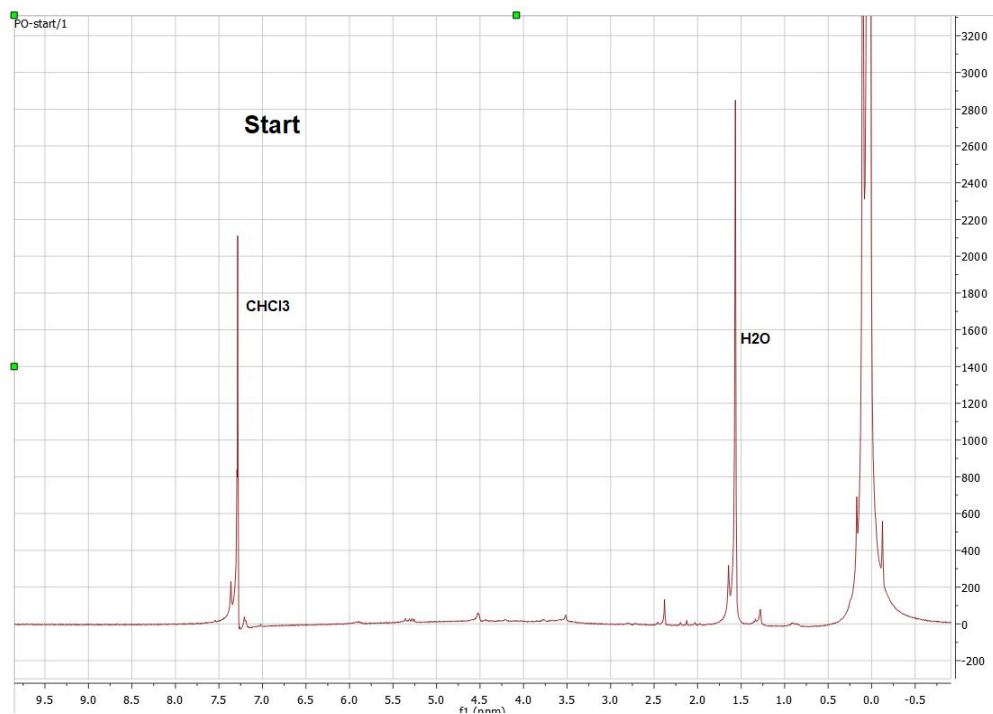

**Figure S5.**  $^1\text{H}$  NMR of 10 mg of Hollocellulose in 1 ml of  $\text{CDCl}_3$

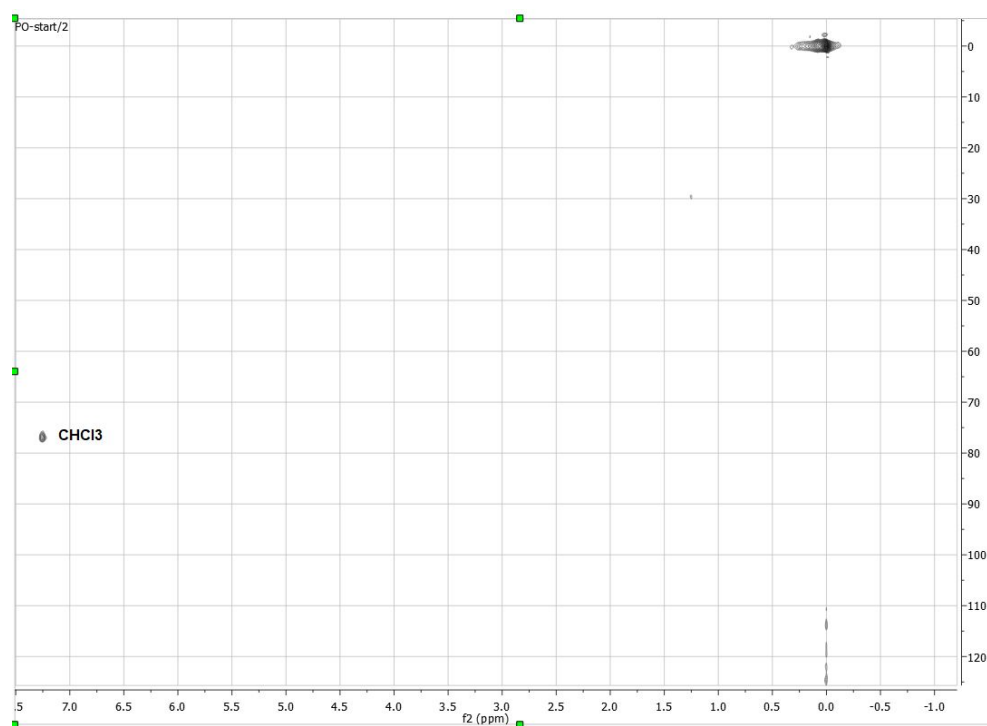

**Figure S6.**  $^1\text{H}$ - $^{13}\text{C}$  HSQC of 10 mg of Hollocellulose in 1 ml of  $\text{CDCl}_3$

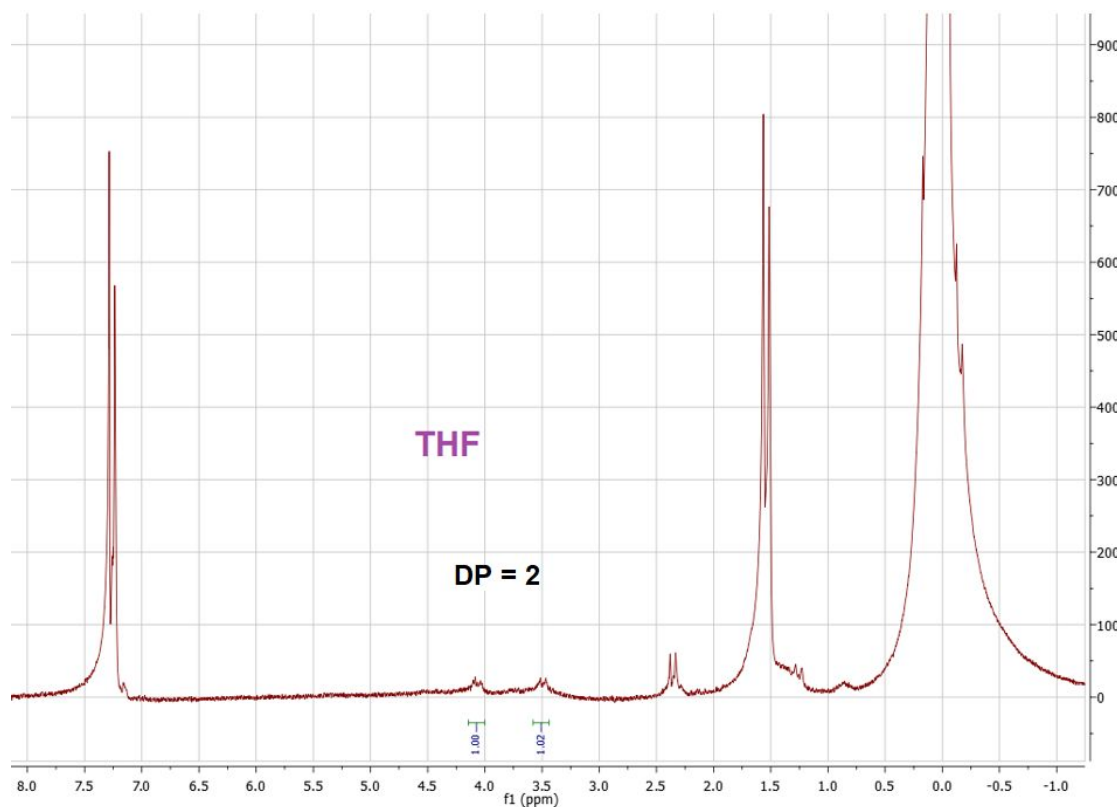

**Figure S7.**  $^1\text{H}$  NMR of 10 mg hollocellulose grafted with PCL with 1/3 (v/v) of THF as a solvent, the analysis was performed in 1 ml  $\text{CDCl}_3$ .

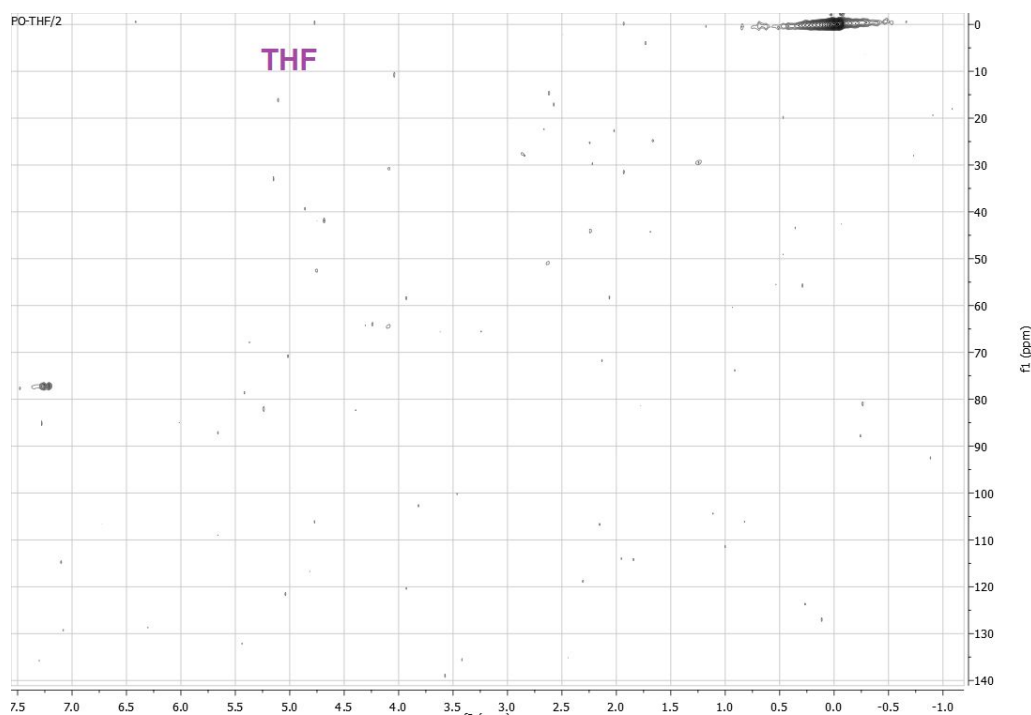

**Figure S8.**  $^1\text{H}$ - $^{13}\text{C}$  HSQC of 10 mg hollocellulose grafted with PCL with 1/3 (v/v) of THF as a solvent, the analysis was performed in 1 ml  $\text{CDCl}_3$ .

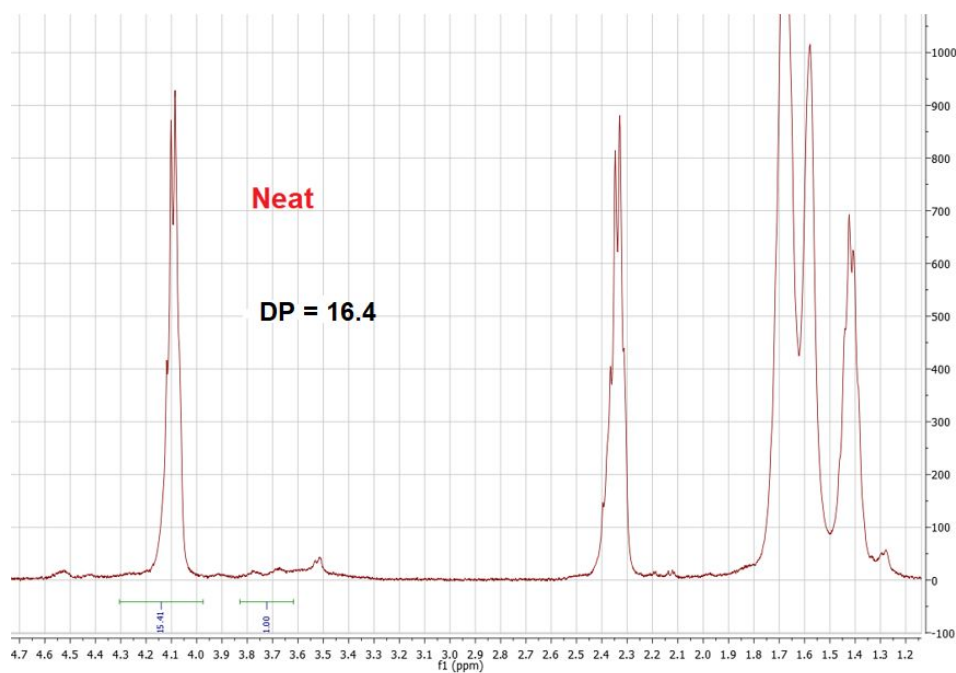

**Figure S9.**  $^1\text{H}$  NMR of 10 mg hollocellulose grafted with PCL under neat conditions, the analysis was performed in 1 ml  $\text{CDCl}_3$ .

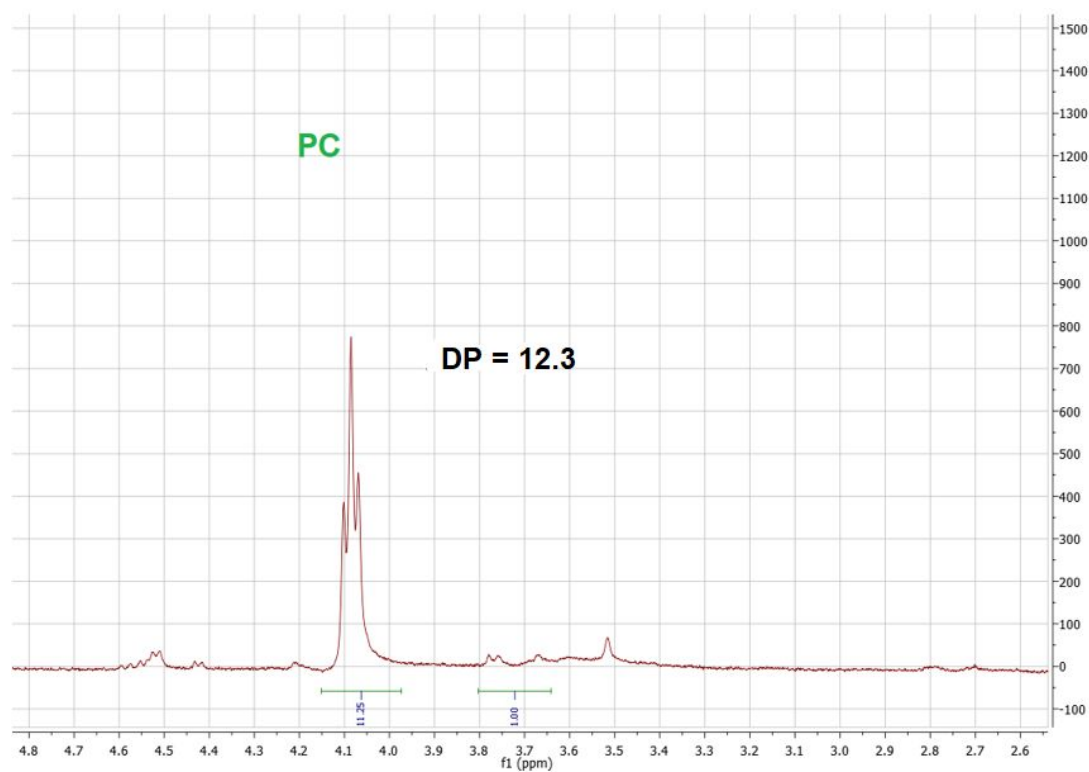

**Figure S10.**  $^1\text{H}$  NMR of 10 mg hollocellulose grafted with PCL with 1/3 (v/v) of PC as a solvent, the analysis was performed in 1 ml  $\text{CDCl}_3$ .



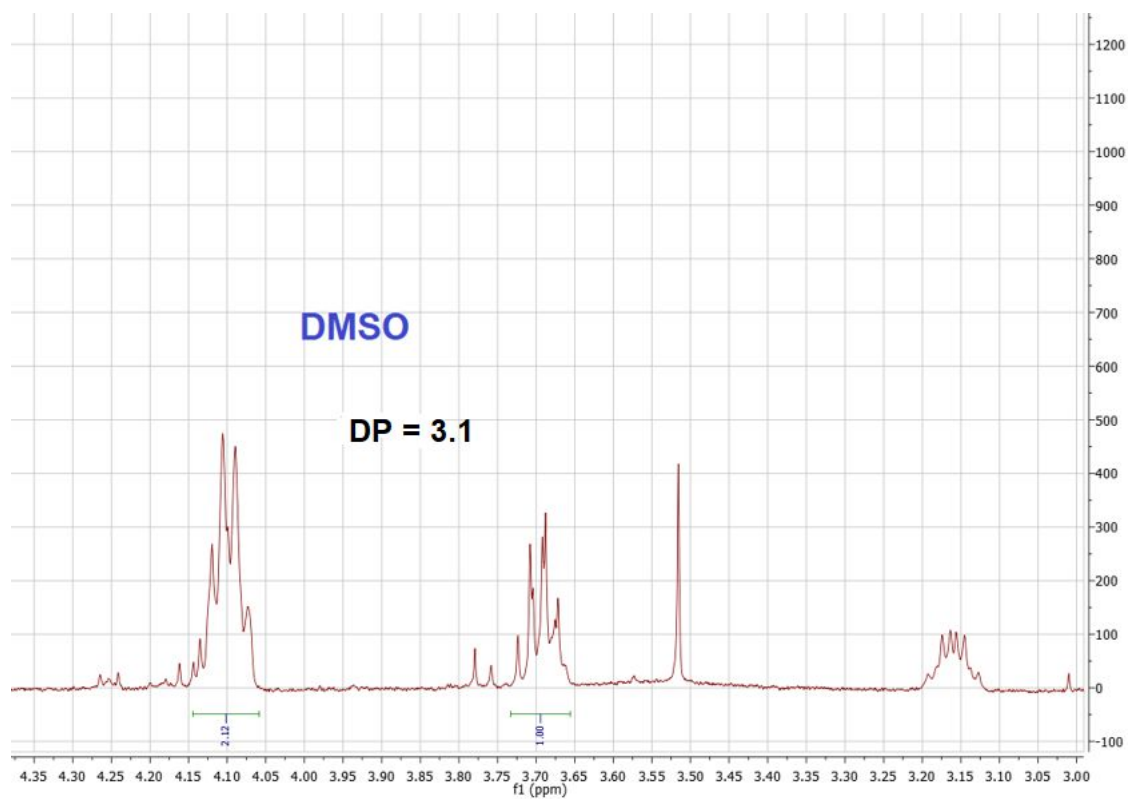

**Figure S11.**  $^1\text{H}$  NMR of 10 mg hollocellulose grafted with PCL with 1/3 (v/v) of DMSO as a solvent, the analysis was performed in 1 ml  $\text{CDCl}_3$ .

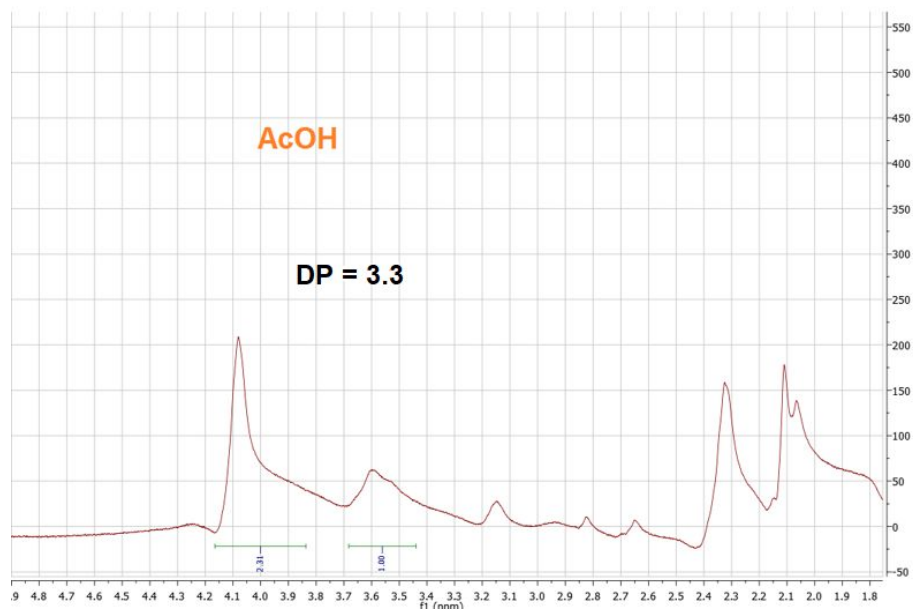

**Figure S12.**  $^1\text{H}$  NMR of 10 mg hollocellulose grafted with PCL with 1/3 (v/v) of AcOH as a solvent, the analysis was performed in 1 ml  $\text{CDCl}_3$ .

## Calculation of graft-coverage. Equation S1

$$(Weight\ Change\ in\ gram)/((DP * M_{CL} * N * Surface\ area))$$

## Free polymer Characterization

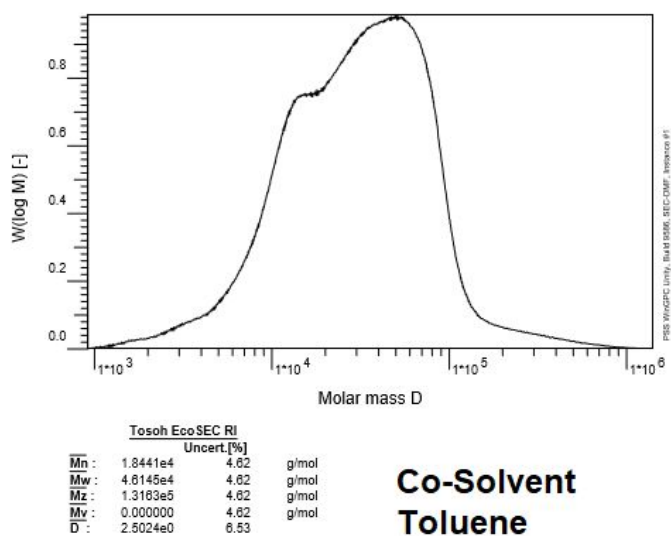

**Figure S13.** GPC traces for the free chains after SI-ROP in toluene as a solvent

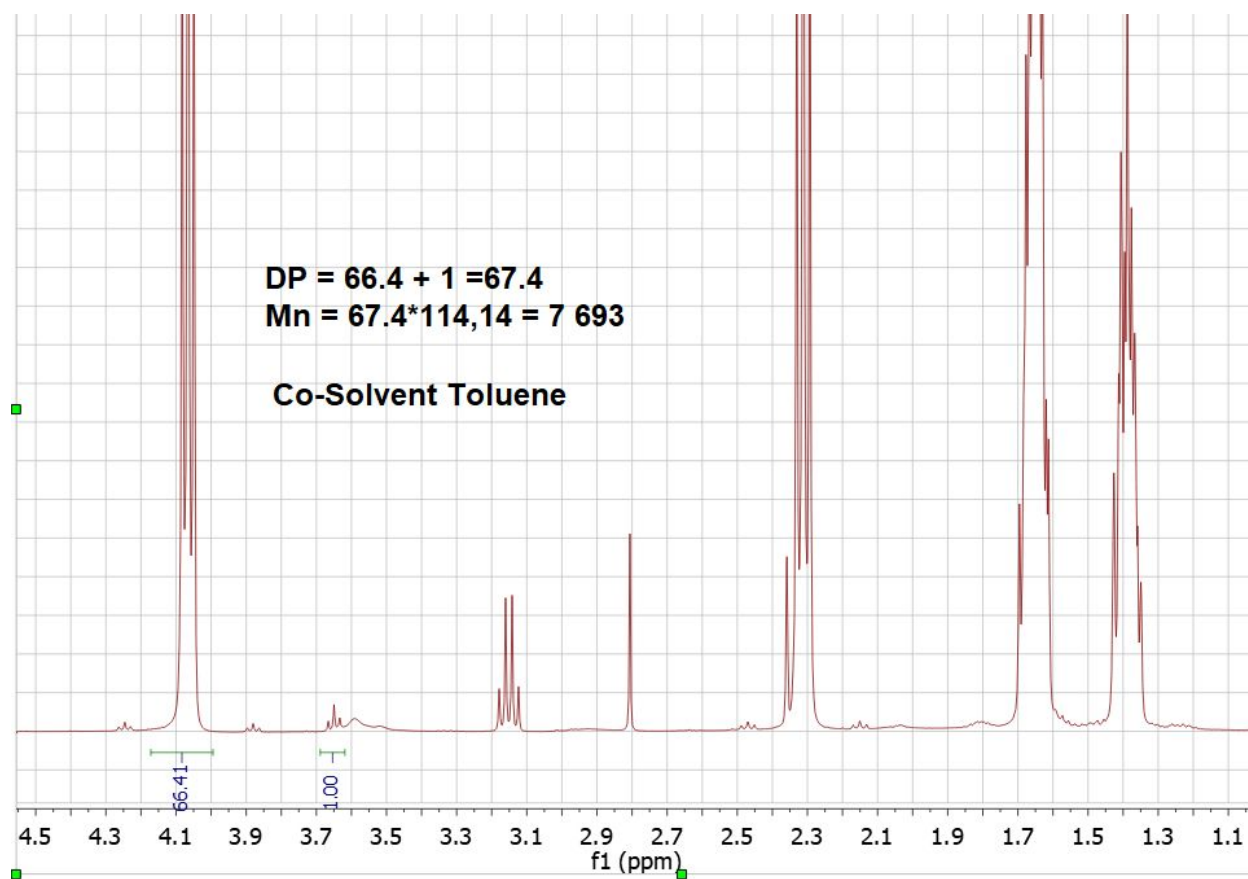

**Figure S14.**  $^1\text{H}$  NMR for the free chains after SI-ROP in toluene as a solvent

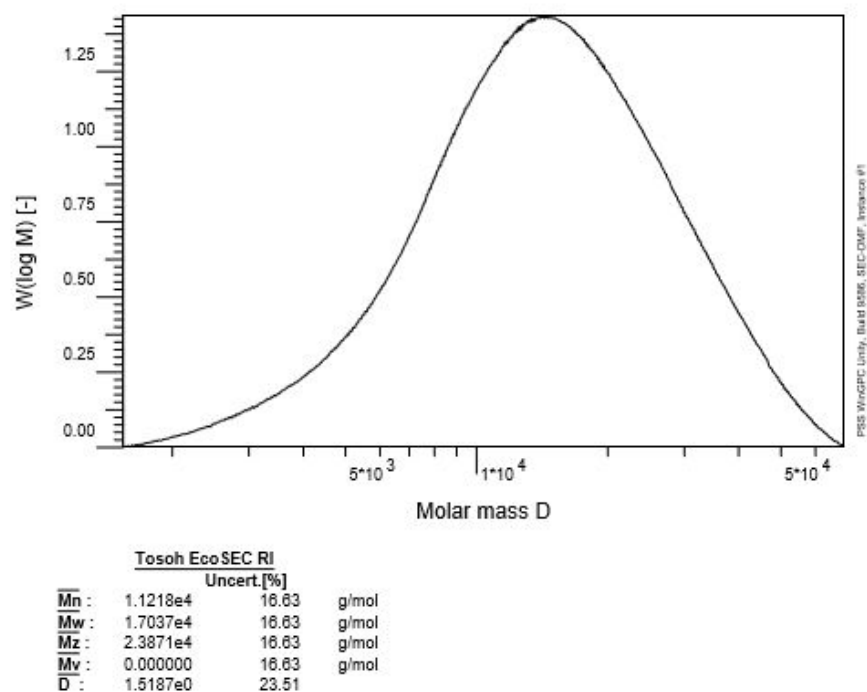

**Figure S15.** GPC traces for the free chains after SI-ROP in Chloroform as a solvent

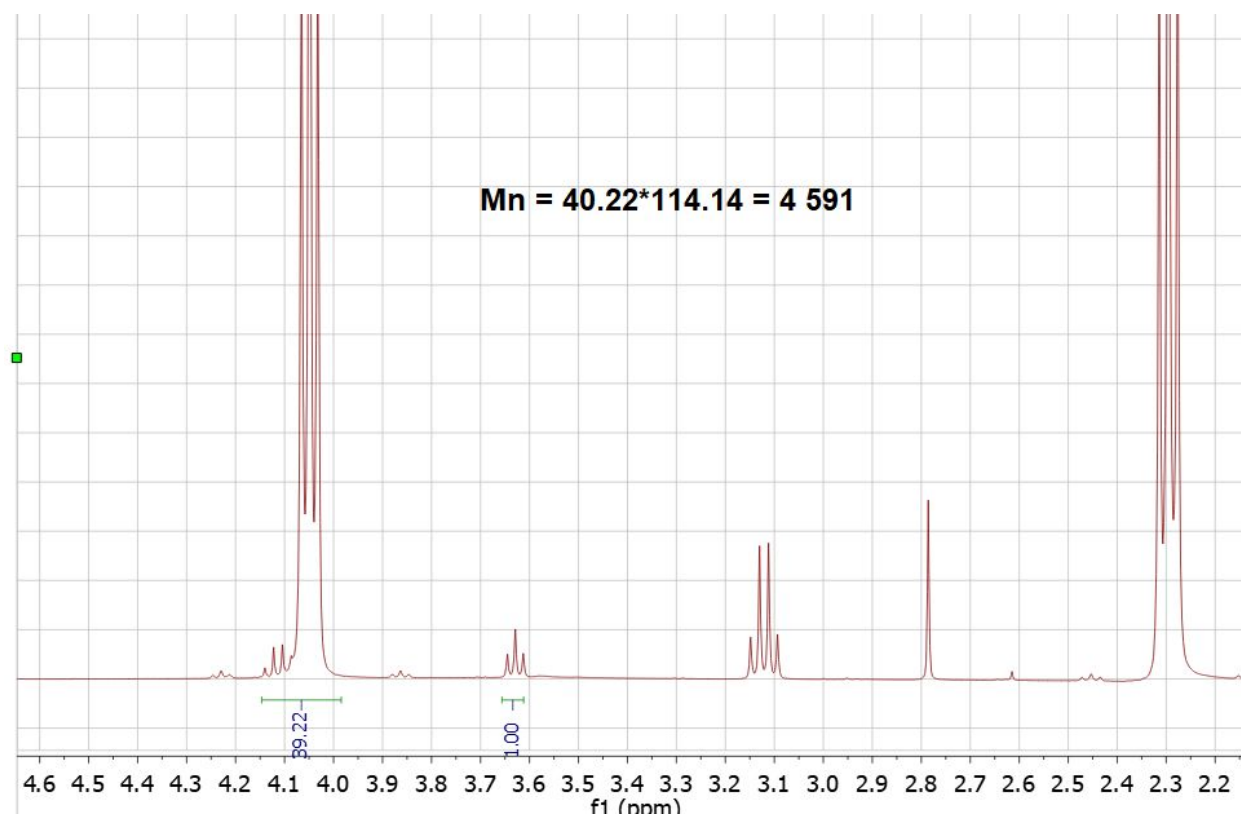

**Figure S16.**  $^1\text{H}$  NMR for the free chains after SI-ROP in chloroform as a solvent

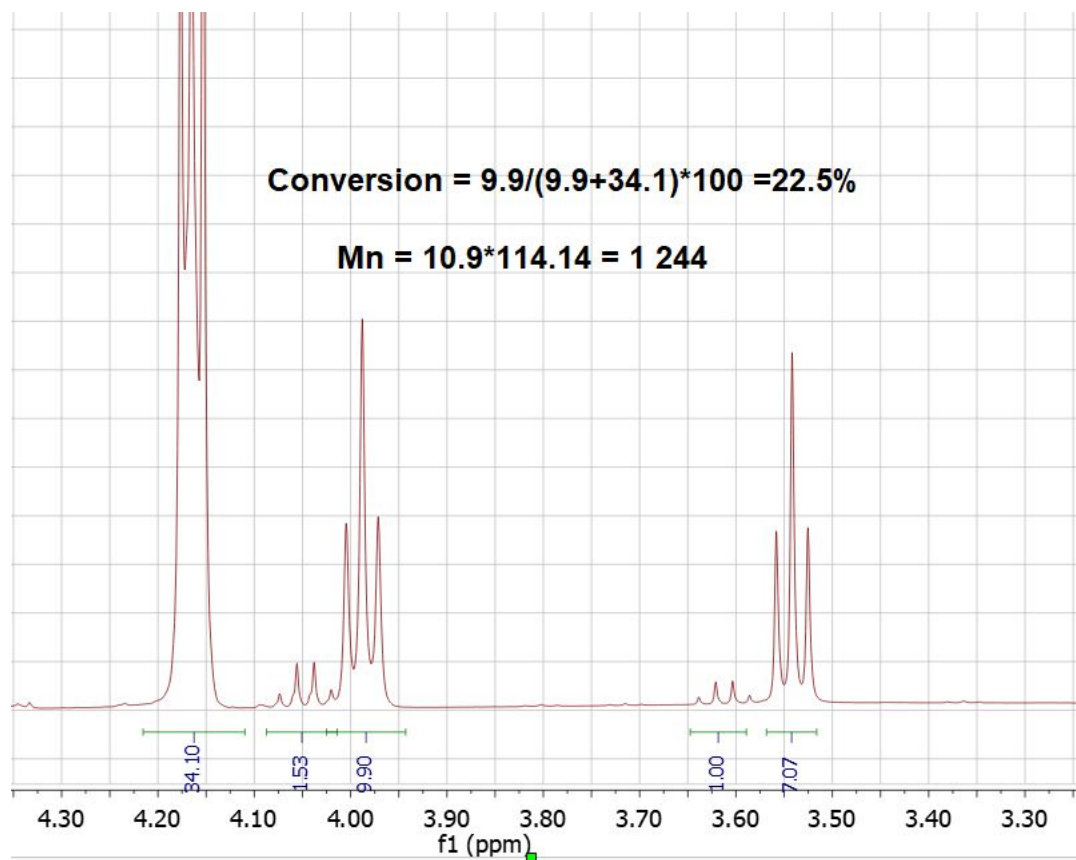

**Figure S17.**  $^1\text{H}$  NMR for the free chains after SI-ROP in DMSO as a solvent

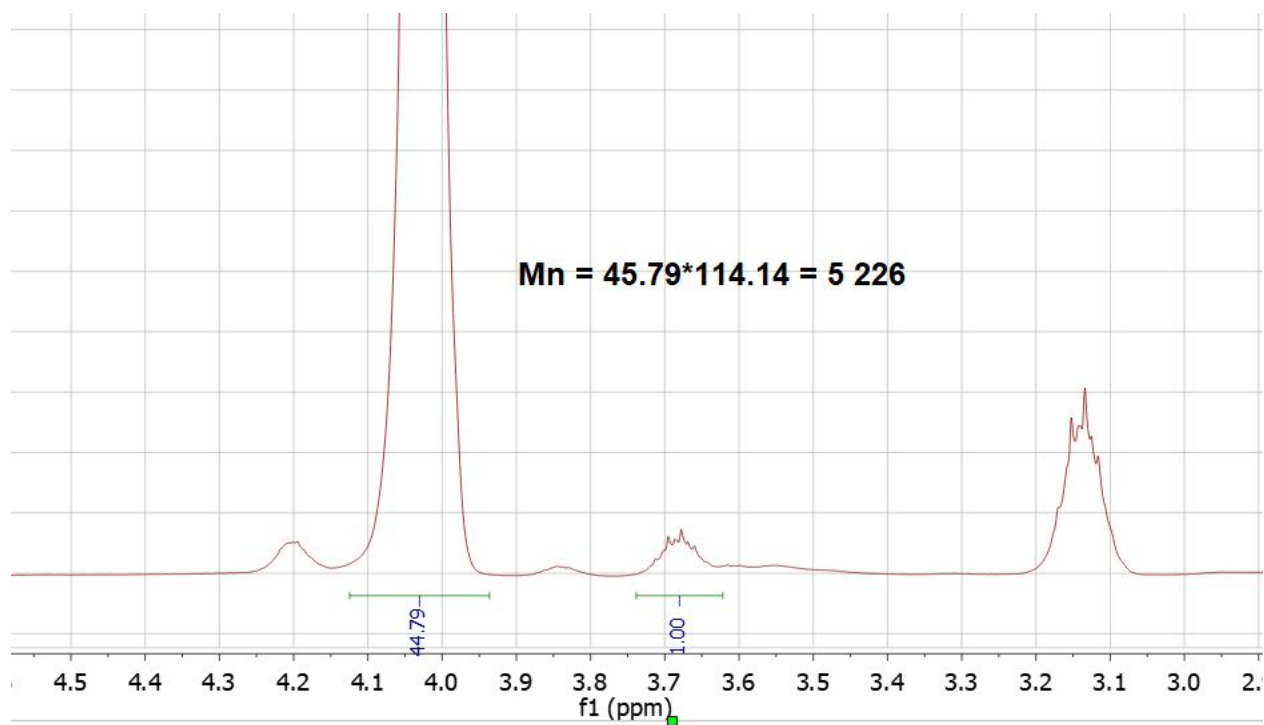

**Figure S18.**  $^1\text{H}$  NMR for the free chains after SI-ROP in AcOH as a solvent

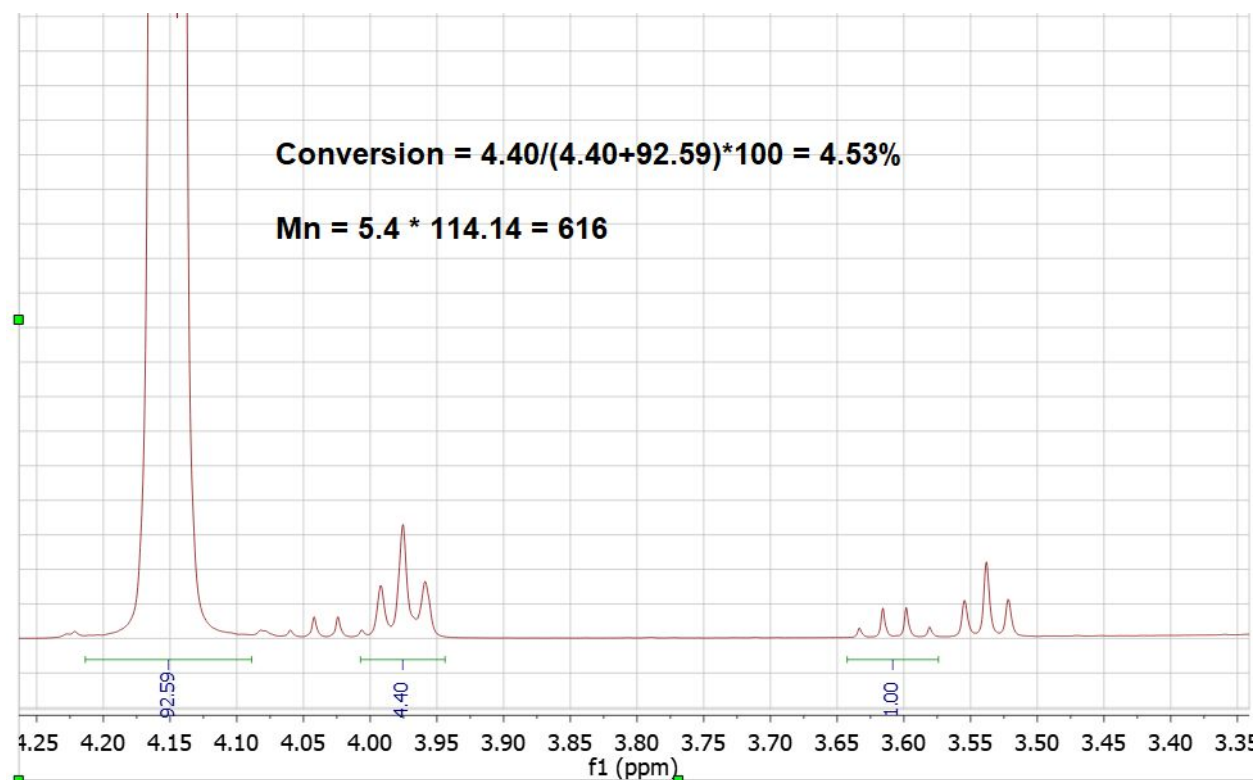

**Figure S19.**  $^1\text{H}$  NMR for the free chains after SI-ROP in DMAc as a solvent

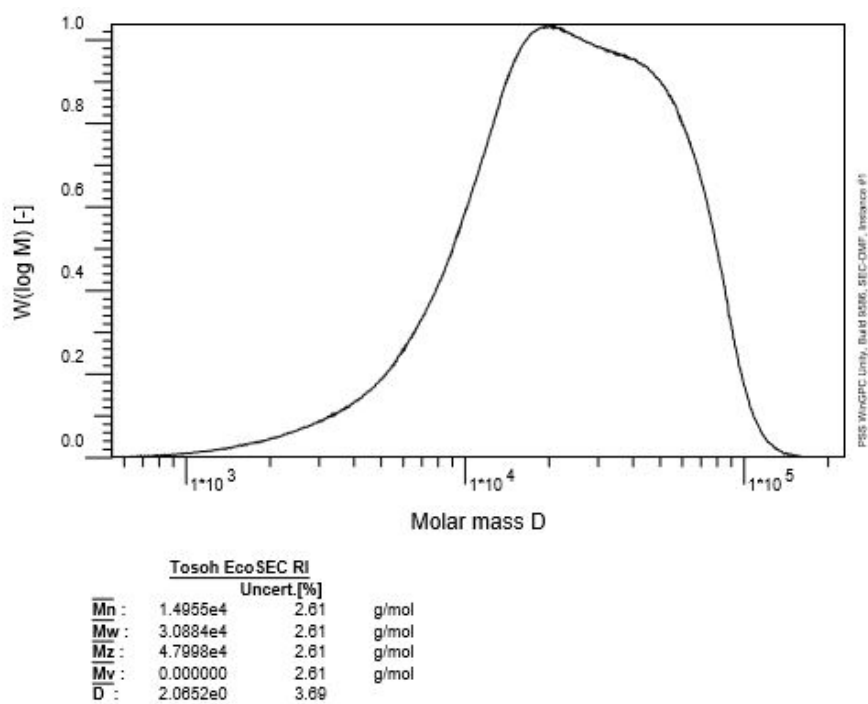

**Figure S20.** GPC traces for the free chains after SI-ROP under neat conditions

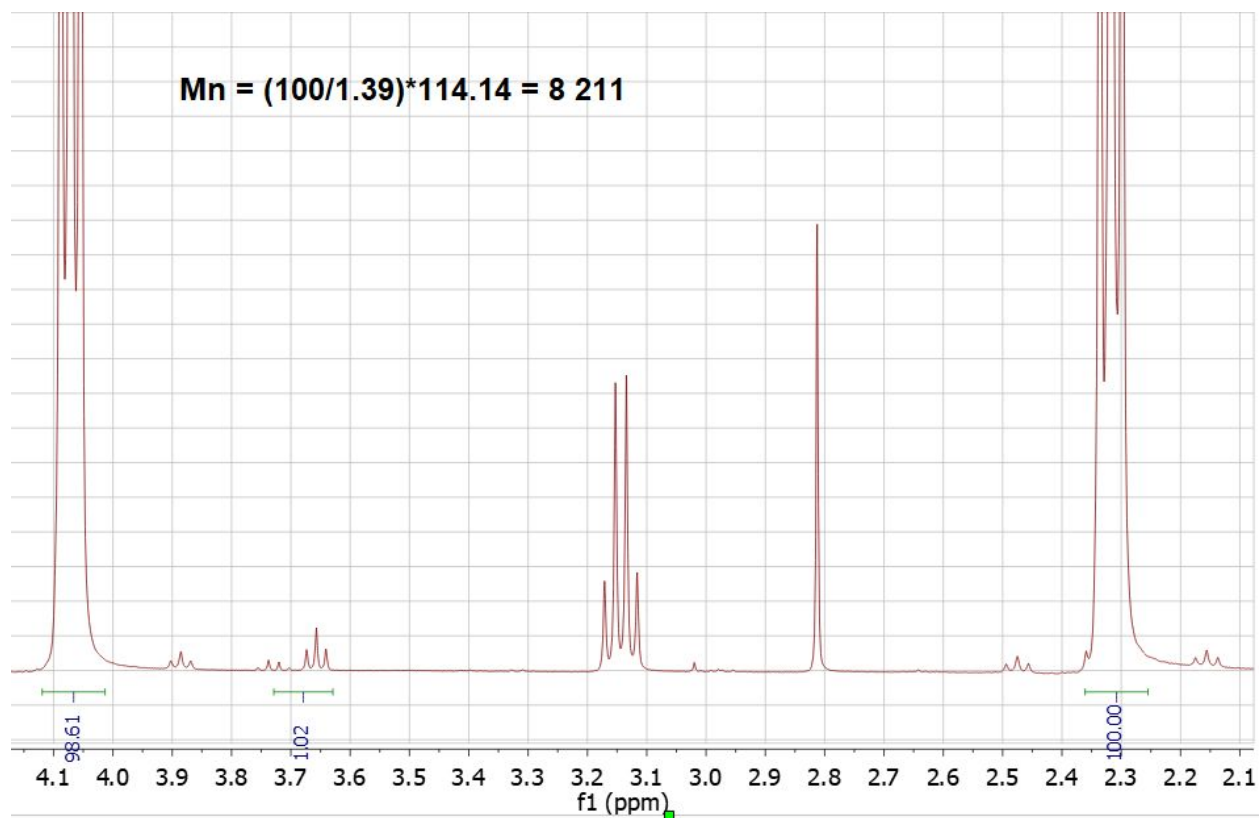

**Figure S21.**  $^1\text{H}$  NMR for the free chains after SI-ROP under neat conditions

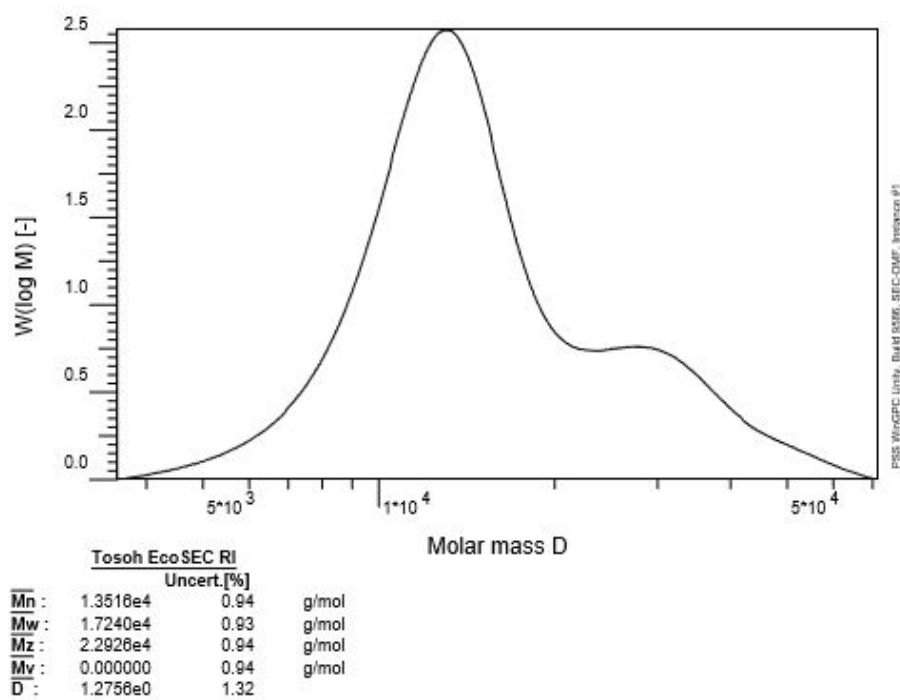

**Figure S22.** GPC traces for the free chains after SI-ROP in THF as a solvent

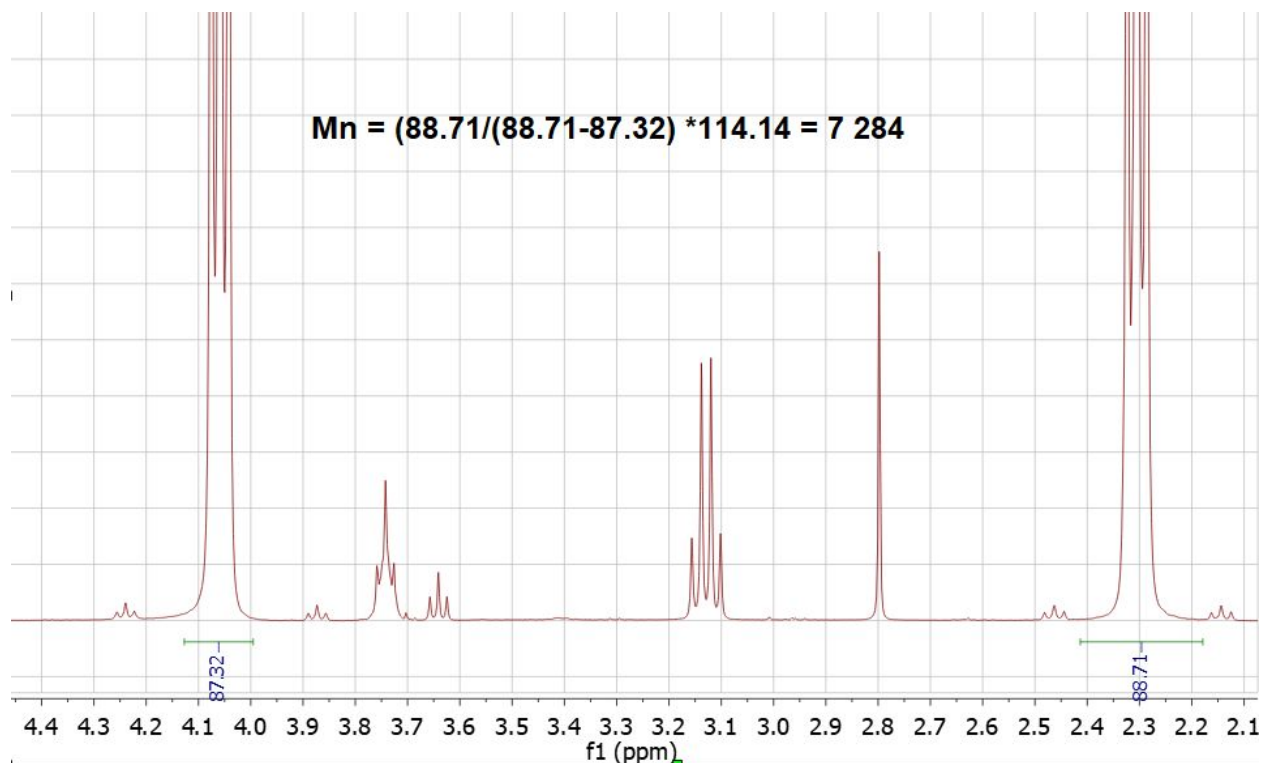

**Figure S23.**  $^1\text{H}$  NMR for the free chains after SI-ROP in THF as a solvent

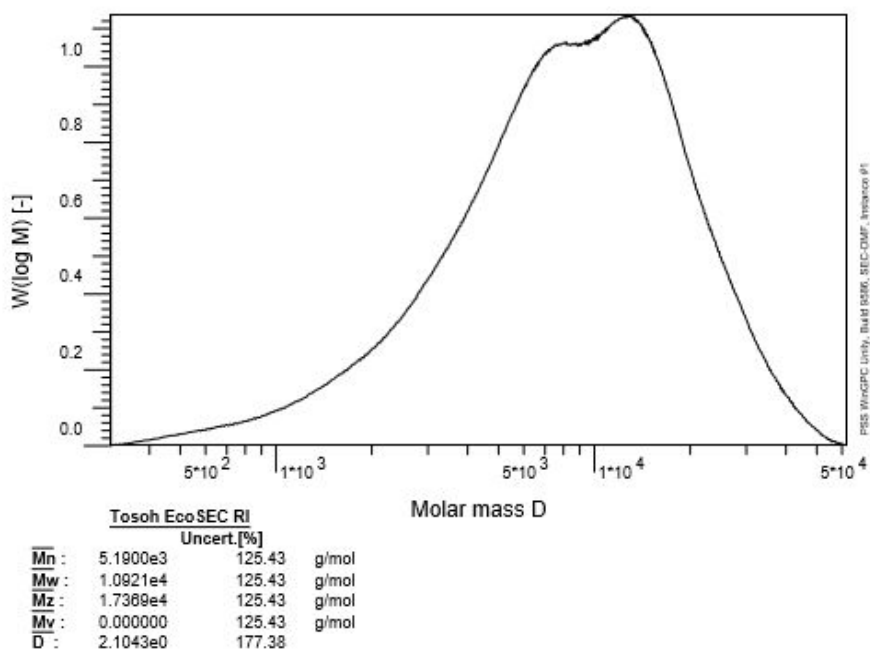

**Figure S24.** GPC traces for the free chains after SI-ROP in Acetone as a solvent



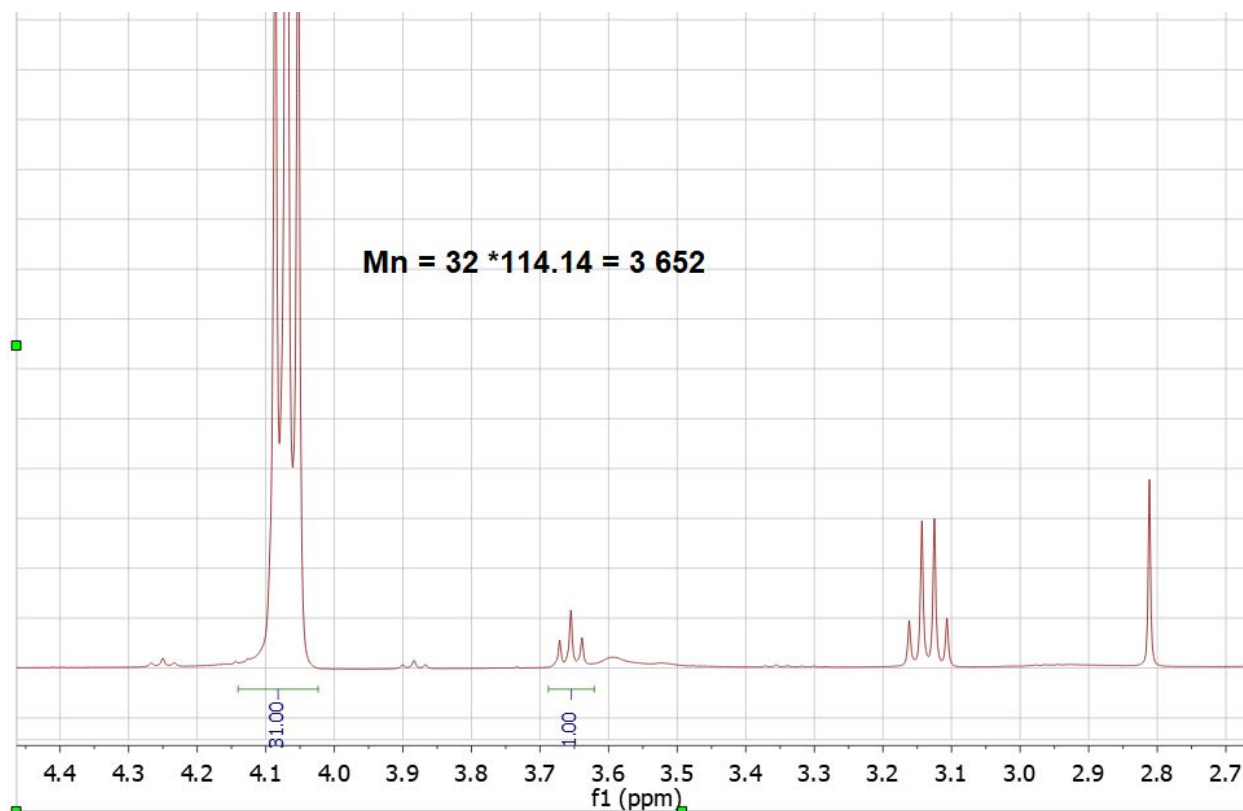

**Figure S25.**  $^1\text{H}$  NMR for the free chains after SI-ROP in Acetone as a solvent

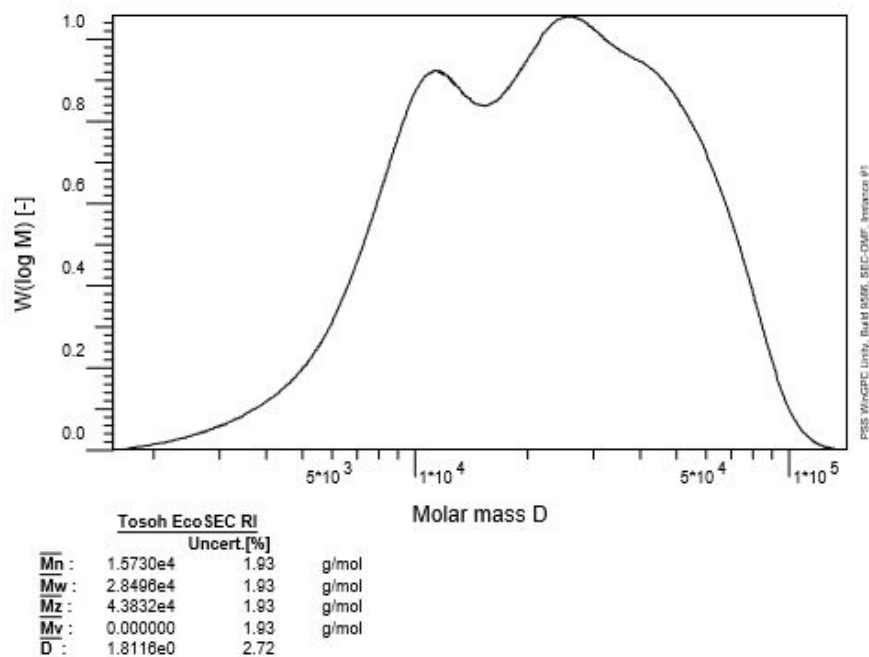

**Figure S26.** GPC traces for the free chains after SI-ROP in MeCN as a solvent

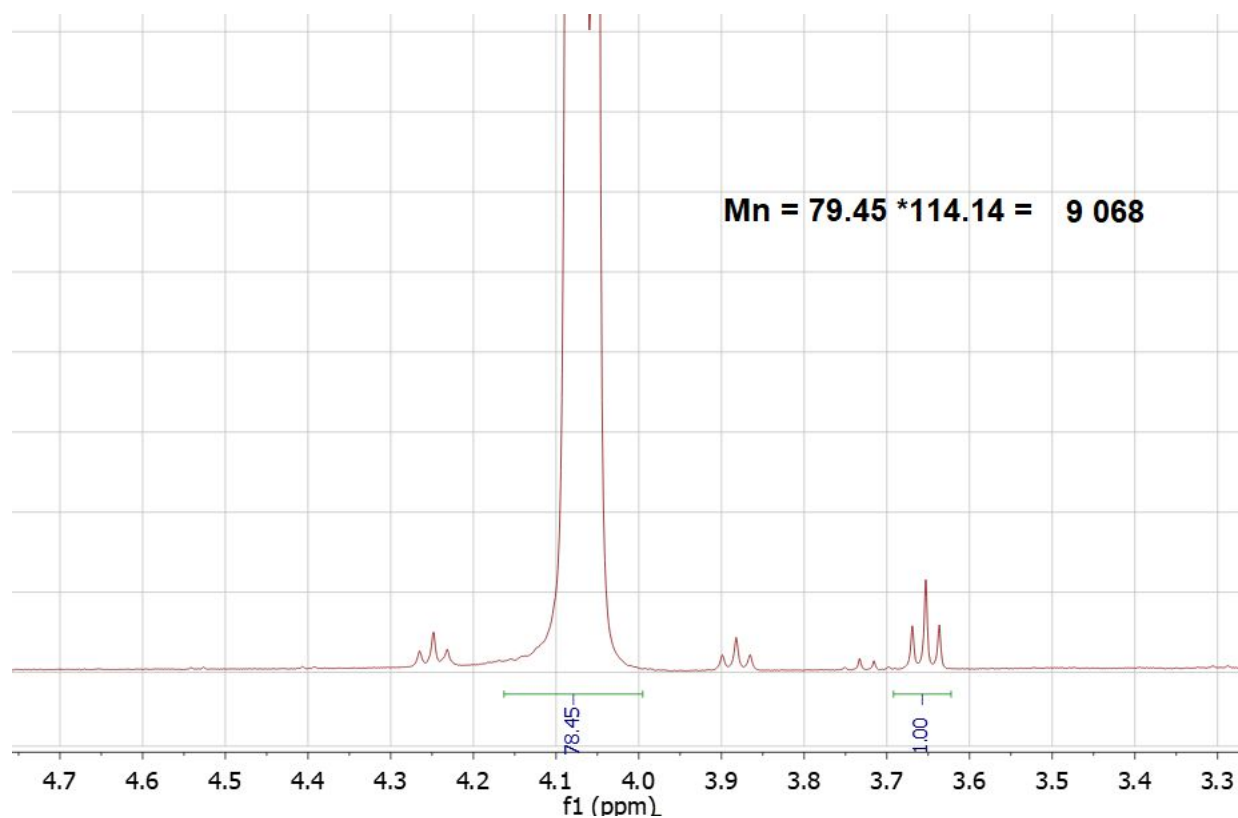

**Figure S27.**  $^1\text{H}$  NMR for the free chains after SI-ROP in MeCN as a solvent

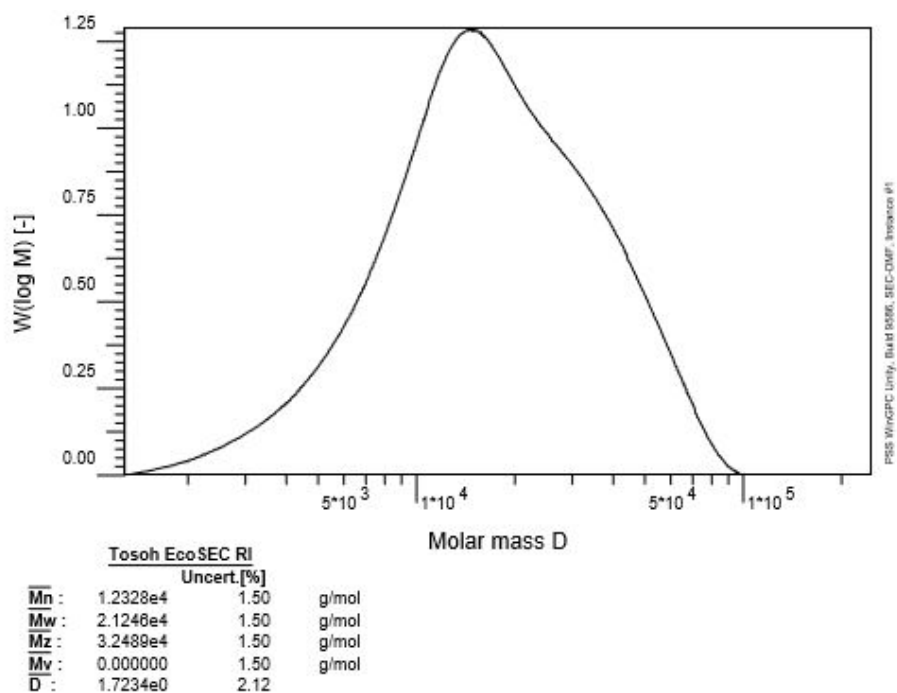

**Figure S28.** GPC traces for the free chains after SI-ROP in PC as a solvent

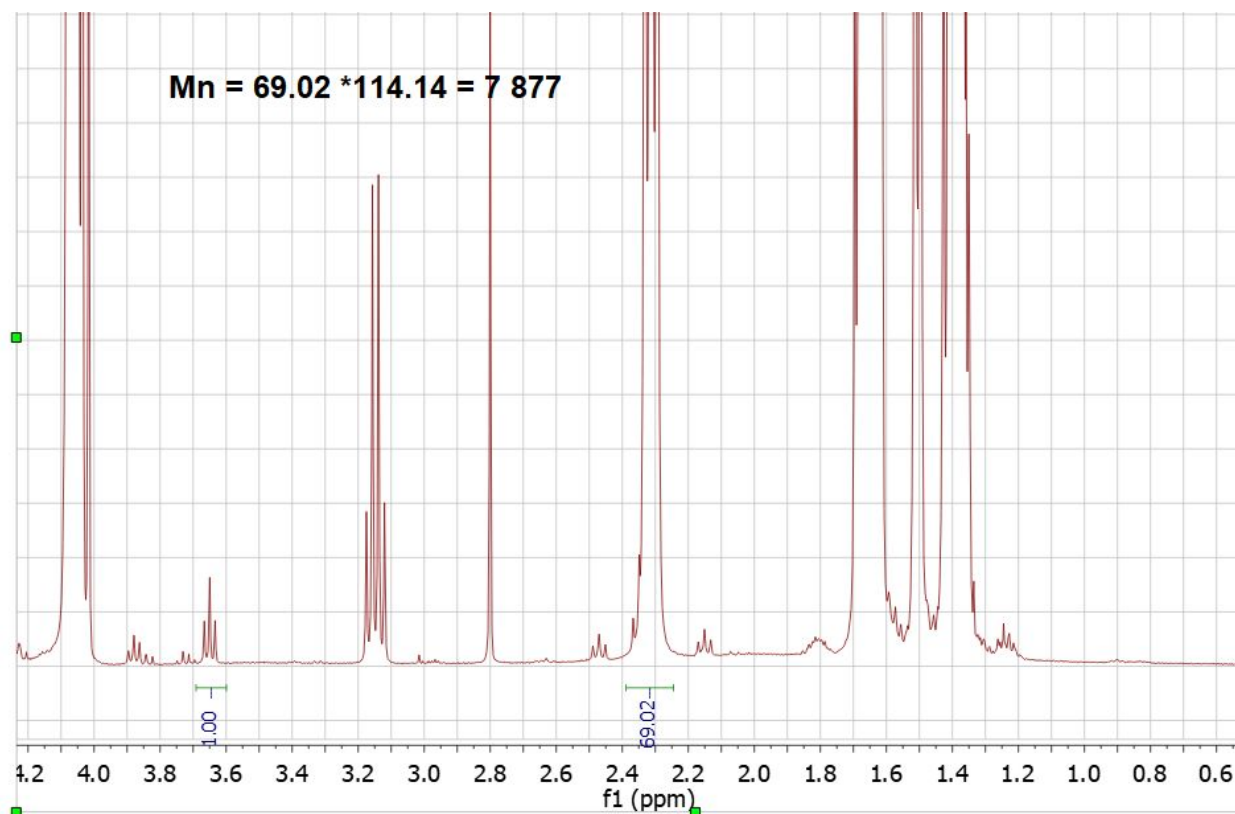

**Figure S29.**  $^1\text{H}$  NMR for the free chains after SI-ROP in PC as a solvent

### Equation S1

Equation used for calculation of the surface density.

$$(\text{Weight Change in gram}) / ((DP \cdot M_{cl} \cdot N \cdot \text{Surface area}))$$

*The calculation was performed under the assumption that the surface area of the holo-cellulose fiber was  $200\text{m}^2/\text{g}$  and that the weight loss during purification was the same for all fibers.*
